# Supplementary material for: Progressive resistance training in head and neck cancer patients during concomitant chemoradiotherapy -- design of the DAHANCA 31 randomized trial
Source: Springer Nature journal article supplement (doi:10.1186/s12885-017-3388-0), 2017-06-03
Supplement: MOESM2 [file 12336506]

Trial record 7 of 11 for: DAHANCA

[Previous Study](#) | [Return to List](#) | [Next Study](#)

## Progressive Resistance Training in Head and Neck Cancer Patients During Concomitant Chemoradiotherapy

**This study is currently recruiting participants. (see [Contacts and Locations](#))**

*Verified May 2016 by Herlev Hospital*

**Sponsor:**

Herlev Hospital

**Collaborators:**

Aarhus University Hospital  
Odense University Hospital  
Danish Head and Neck Cancer Group

**Information provided by (Responsible Party):**

Julie Gehl, Herlev Hospital

**ClinicalTrials.gov Identifier:**

NCT02557529

First received: September 11, 2015

Last updated: May 16, 2016

Last verified: May 2016

[History of Changes](#)

[Full Text View](#)
[Tabular View](#)
[No Study Results Posted](#)
[Disclaimer](#)
[How to Read a Study Record](#)

### Tracking Information

|                                                                                                  |                                                                                                                                                                                                                                                                                                                                                                                                                                                                                                                                                                                                                                                                                                                                                                                                                                                                                                                                                                                                     |
|--------------------------------------------------------------------------------------------------|-----------------------------------------------------------------------------------------------------------------------------------------------------------------------------------------------------------------------------------------------------------------------------------------------------------------------------------------------------------------------------------------------------------------------------------------------------------------------------------------------------------------------------------------------------------------------------------------------------------------------------------------------------------------------------------------------------------------------------------------------------------------------------------------------------------------------------------------------------------------------------------------------------------------------------------------------------------------------------------------------------|
| <b>First Received Date</b> <a href="#">ICMJE</a>                                                 | September 11, 2015                                                                                                                                                                                                                                                                                                                                                                                                                                                                                                                                                                                                                                                                                                                                                                                                                                                                                                                                                                                  |
| <b>Last Updated Date</b>                                                                         | May 16, 2016                                                                                                                                                                                                                                                                                                                                                                                                                                                                                                                                                                                                                                                                                                                                                                                                                                                                                                                                                                                        |
| <b>Start Date</b> <a href="#">ICMJE</a>                                                          | August 2015                                                                                                                                                                                                                                                                                                                                                                                                                                                                                                                                                                                                                                                                                                                                                                                                                                                                                                                                                                                         |
| <b>Estimated Primary Completion Date</b>                                                         | December 2017 (final data collection date for primary outcome measure)                                                                                                                                                                                                                                                                                                                                                                                                                                                                                                                                                                                                                                                                                                                                                                                                                                                                                                                              |
| <b>Current Primary Outcome Measures</b> <a href="#">ICMJE</a><br>(submitted: September 22, 2015) | Change in LBM (lean body mass) [ Time Frame: at 12-weeks post PRT ] [ Designated as safety issue: No ]<br>change in kilograms                                                                                                                                                                                                                                                                                                                                                                                                                                                                                                                                                                                                                                                                                                                                                                                                                                                                       |
| <b>Original Primary Outcome Measures</b> <a href="#">ICMJE</a>                                   | <i>Same as current</i>                                                                                                                                                                                                                                                                                                                                                                                                                                                                                                                                                                                                                                                                                                                                                                                                                                                                                                                                                                              |
| <b>Change History</b>                                                                            | <a href="#">Complete list of historical versions of study NCT02557529 on ClinicalTrials.gov Archive Site</a>                                                                                                                                                                                                                                                                                                                                                                                                                                                                                                                                                                                                                                                                                                                                                                                                                                                                                        |
| <b>Current Secondary Outcome Measures</b> <a href="#">ICMJE</a><br>(submitted: May 16, 2016)     | <ul style="list-style-type: none"> <li>• Change in LBM (lean body mass) [ Time Frame: at 6 weeks, and 6 and 12 months post RT ]<br/>[ Designated as safety issue: No ]<br/>change in kilograms</li> <li>• Fat mass [ Time Frame: at 6 and 12 weeks, and 6 and 12 months post RT ]<br/>[ Designated as safety issue: No ]<br/>change in kilograms</li> <li>• Weight loss [ Time Frame: at 6 and 12 weeks, and 6 and 12 months post RT ]<br/>[ Designated as safety issue: No ]<br/>in kilograms</li> <li>• pain [ Time Frame: at 6 and 12 weeks, and 6 and 12 months post RT ]<br/>[ Designated as safety issue: Yes ]<br/>measured by NRS-scale</li> <li>• Quality of Life [ Time Frame: at 6 and 12 weeks, and 6 and 12 months post RT ]<br/>[ Designated as safety issue: No ]<br/>QLQ-C30 questionnaire</li> <li>• Muscle strength [ Time Frame: at 6 and 12 weeks, and 6 and 12 months post RT ]<br/>[ Designated as safety issue: No ]<br/>measured using chest press and leg press</li> </ul> |

- Chair rise [ Time Frame: at 6 and 12 weeks, and 6 and 12 months post RT ]  
[ Designated as safety issue: No ]  
measured using 30 s. chair rise
- arm curls [ Time Frame: at 6 and 12 weeks, and 6 and 12 months post RT ]  
[ Designated as safety issue: No ]  
measured using 30 s. arm curls
- Stair climb [ Time Frame: at 6 and 12 weeks, 6 and 12 months ] [ Designated as safety issue: No ]  
steps/sec
- Compliance to PRT program [ Time Frame: at 12 weeks post PRT ]  
[ Designated as safety issue: No ]  
No. of attended sessions out of total
- Physical activity [ Time Frame: at 6 and 12 weeks, and 6 and 12 months post RT ]  
[ Designated as safety issue: No ]  
measured by PAS (physical activity scale)
- Percent of patients with feeding tubes [ Time Frame: at 6 and 12 weeks, and 6 and 12 months post RT ] [ Designated as safety issue: Yes ]
- Resumption of work [ Time Frame: At 12 months follow-up ] [ Designated as safety issue: No ]  
No. of days from end of radiotherapy until back at work at full time (or the hours of work per week as before therapy)
- Percent relapses [ Time Frame: at 12 months follow-up ] [ Designated as safety issue: Yes ]  
Percent of patients having relapse within 12 months after radiotherapy
- Cytokines [ Time Frame: at 3, 6, 8, 10, and 12 weeks ] [ Designated as safety issue: No ]  
Measurement of different cytokines, changes over time and after bout of PRT. Will be measured regularly during the 12 weeks of PRT.
- Muscle biopsies [ Time Frame: at 6 and 12 weeks, and at 12 months follow-up ]  
[ Designated as safety issue: No ]  
protein will be measured using the proteomic approach. Muscle fiber type and size will be evaluated.
- Patient satisfaction [ Time Frame: at 12 weeks ] [ Designated as safety issue: No ]  
Study specific questionnaire regarding pros and cons of attending the study
- NK-cells [ Time Frame: at 3 and 12 weeks ] [ Designated as safety issue: No ]  
Measuring NK-cells. NK-cells may increase after exercise and show tumor inhibiting effect.

**Original Secondary Outcome Measures** [ICMJE](#)  
(submitted: September 22, 2015)

- Change in LBM (lean body mass) [ Time Frame: at 6 weeks, and 6 and 12 months post RT ]  
[ Designated as safety issue: No ]  
change in kilograms
- Fat mass [ Time Frame: at 6 and 12 weeks, and 6 and 12 months post RT ]  
[ Designated as safety issue: No ]  
change in kilograms
- Weight loss [ Time Frame: at 6 and 12 weeks, and 6 and 12 months post RT ]  
[ Designated as safety issue: No ]  
in kilograms
- pain [ Time Frame: at 6 and 12 weeks, and 6 and 12 months post RT ]  
[ Designated as safety issue: Yes ]  
measured by NRS-scale
- Quality of Life [ Time Frame: at 6 and 12 weeks, and 6 and 12 months post RT ]  
[ Designated as safety issue: No ]  
QLQ-C30 questionnaire
- Muscle strength [ Time Frame: at 6 and 12 weeks, and 6 and 12 months post RT ]  
[ Designated as safety issue: No ]  
measured using chest press and leg press
- Chair rise [ Time Frame: at 6 and 12 weeks, and 6 and 12 months post RT ]  
[ Designated as safety issue: No ]  
measured using 30 s. chair rise
- arm curls [ Time Frame: at 6 and 12 weeks, and 6 and 12 months post RT ]  
[ Designated as safety issue: No ]  
measured using 30 s. arm curls
- Stair climb [ Time Frame: at 6 and 12 weeks, 6 and 12 months ] [ Designated as safety issue: No ]  
steps/sec

|                                                              |                                                                                                                                                                                                                                                                                                                                                                                                                                                                                                                                                                                                                                                                                                                                                                                                                                                                                                                                                                                                                                                                                                                                                                                                                                                                                                                                                                                                                                                                                              |
|--------------------------------------------------------------|----------------------------------------------------------------------------------------------------------------------------------------------------------------------------------------------------------------------------------------------------------------------------------------------------------------------------------------------------------------------------------------------------------------------------------------------------------------------------------------------------------------------------------------------------------------------------------------------------------------------------------------------------------------------------------------------------------------------------------------------------------------------------------------------------------------------------------------------------------------------------------------------------------------------------------------------------------------------------------------------------------------------------------------------------------------------------------------------------------------------------------------------------------------------------------------------------------------------------------------------------------------------------------------------------------------------------------------------------------------------------------------------------------------------------------------------------------------------------------------------|
|                                                              | <ul style="list-style-type: none"> <li>Compliance to PRT program [ Time Frame: at 12 weeks post PRT ]<br/>[ Designated as safety issue: No ]<br/>No. of attended sessions out of total</li> <li>Physical activity [ Time Frame: at 6 and 12 weeks, and 6 and 12 months post RT ]<br/>[ Designated as safety issue: No ]<br/>measured by PAS (physical activity scale)</li> <li>Percent of patients with feeding tubes [ Time Frame: at 6 and 12 weeks, and 6 and 12 months post RT ] [ Designated as safety issue: Yes ]</li> <li>Resumption of work [ Time Frame: At 12 months follow-up ] [ Designated as safety issue: No ]<br/>No. of days from end of radiotherapy until back at work at full time (or the hours of work per week as before therapy)</li> <li>Percent relapses [ Time Frame: at 12 months follow-up ] [ Designated as safety issue: Yes ]<br/>Percent of patients having relapse within 12 months after radiotherapy</li> </ul>                                                                                                                                                                                                                                                                                                                                                                                                                                                                                                                                         |
| <b>Current Other Outcome Measures</b> <a href="#">ICMJE</a>  | <i>Not Provided</i>                                                                                                                                                                                                                                                                                                                                                                                                                                                                                                                                                                                                                                                                                                                                                                                                                                                                                                                                                                                                                                                                                                                                                                                                                                                                                                                                                                                                                                                                          |
| <b>Original Other Outcome Measures</b> <a href="#">ICMJE</a> | <i>Not Provided</i>                                                                                                                                                                                                                                                                                                                                                                                                                                                                                                                                                                                                                                                                                                                                                                                                                                                                                                                                                                                                                                                                                                                                                                                                                                                                                                                                                                                                                                                                          |
| <b>Descriptive Information</b>                               |                                                                                                                                                                                                                                                                                                                                                                                                                                                                                                                                                                                                                                                                                                                                                                                                                                                                                                                                                                                                                                                                                                                                                                                                                                                                                                                                                                                                                                                                                              |
| <b>Brief Title</b> <a href="#">ICMJE</a>                     | Progressive Resistance Training in Head and Neck Cancer Patients During Concomitant Chemoradiotherapy                                                                                                                                                                                                                                                                                                                                                                                                                                                                                                                                                                                                                                                                                                                                                                                                                                                                                                                                                                                                                                                                                                                                                                                                                                                                                                                                                                                        |
| <b>Official Title</b> <a href="#">ICMJE</a>                  | Progressive Resistance Training in Head and Neck Cancer Patients During Concomitant Chemoradiotherapy - The <b>DAHANCA</b> 31 Study                                                                                                                                                                                                                                                                                                                                                                                                                                                                                                                                                                                                                                                                                                                                                                                                                                                                                                                                                                                                                                                                                                                                                                                                                                                                                                                                                          |
| <b>Brief Summary</b>                                         | <p>72 patients with head and neck cancer, undergoing primary treatment with radiation therapy and concomitant weekly cisplatin, will be recruited to this multicentre trial.</p> <p>Randomized 1:1 to either 12-week progressive resistance training (PRT) program or control arm, starting together with concomitant chemoradiotherapy (CCRT) Stratified by centre, gender, p16-status and body mass index (BMI) below or above 30.</p> <p>Primary endpoint is difference in change in lean body mass (LBM) between the groups and the endpoint is reduction of LBM loss in intervention arm by 25% compared to control.</p> <p>Secondary endpoints include side-effects to treatment, change in body composition, physical function and strength, and compliance to PRT. Questionnaires on QoL, diet, voluntary exercise and work affiliation will also be registered.</p> <p>Blood samples for explorative analyses will be drawn and optional muscle biopsies drawn for proteomics analyses and histological analyses.</p>                                                                                                                                                                                                                                                                                                                                                                                                                                                               |
| <b>Detailed Description</b>                                  | <p>The PRT program will start about the onset of radiotherapy. The program consists of 7 exercises in training machines and involves the major muscle groups of the body.</p> <p>The program has previously been found to successfully restore the loss of lean body mass (LBM) in head and neck cancer patients post-treatment. A group based approach will be used to facilitate a social and motivating training environment for the patients. A pilot study (NCT02068950) showed feasibility of PRT during CCRT.</p> <p>In addition to baseline data (height, tumor stage, performance status, etc), the following parameters will be registered: Weight, patient reported side effects, as well as a questionnaire on amount of physical activity and food intake.</p> <p>Physical function and strength will be tested at baseline, after the course of chemoradiotherapy and at the end of the 12-week PRT programme, and at 6 and 12 months follow-up. DXA scans for body composition will be performed using a Lunar iDXA (GE Healthcare).</p> <p>Blood samples will be drawn at regular intervals during the 12 weeks and at follow-up.</p> <p>Patient reported quality of life (EORTC Quality of Life Questionnaire (QLQ)-C30 and QLQ-H&amp;N35) will also be registered.</p> <p>Muscle biopsies will be taken three times: at baseline, after treatment and after 12-weeks PRT.</p> <p>Study duration is expected to be 18 months and an additional 12 months for follow-up.</p> |
| <b>Study Type</b> <a href="#">ICMJE</a>                      | Interventional                                                                                                                                                                                                                                                                                                                                                                                                                                                                                                                                                                                                                                                                                                                                                                                                                                                                                                                                                                                                                                                                                                                                                                                                                                                                                                                                                                                                                                                                               |
| <b>Study Phase</b>                                           | Phase 2                                                                                                                                                                                                                                                                                                                                                                                                                                                                                                                                                                                                                                                                                                                                                                                                                                                                                                                                                                                                                                                                                                                                                                                                                                                                                                                                                                                                                                                                                      |
| <b>Study Design</b> <a href="#">ICMJE</a>                    | Allocation: Randomized<br>Endpoint Classification: Efficacy Study                                                                                                                                                                                                                                                                                                                                                                                                                                                                                                                                                                                                                                                                                                                                                                                                                                                                                                                                                                                                                                                                                                                                                                                                                                                                                                                                                                                                                            |

|                                                                                                                                                 |                                                                                                                                                                                                                                                                                                                                                                                                                                                                                                                                                                                                                                                                                                                                                                                                                                                                                                                                               |
|-------------------------------------------------------------------------------------------------------------------------------------------------|-----------------------------------------------------------------------------------------------------------------------------------------------------------------------------------------------------------------------------------------------------------------------------------------------------------------------------------------------------------------------------------------------------------------------------------------------------------------------------------------------------------------------------------------------------------------------------------------------------------------------------------------------------------------------------------------------------------------------------------------------------------------------------------------------------------------------------------------------------------------------------------------------------------------------------------------------|
|                                                                                                                                                 | Intervention Model: Factorial Assignment<br>Masking: Open Label<br>Primary Purpose: Supportive Care                                                                                                                                                                                                                                                                                                                                                                                                                                                                                                                                                                                                                                                                                                                                                                                                                                           |
| <b>Condition</b> <a href="#">ICMJE</a>                                                                                                          | <ul style="list-style-type: none"> <li>• Head and Neck Neoplasms</li> <li>• Weight Loss</li> </ul>                                                                                                                                                                                                                                                                                                                                                                                                                                                                                                                                                                                                                                                                                                                                                                                                                                            |
| <b>Intervention</b> <a href="#">ICMJE</a>                                                                                                       | <ul style="list-style-type: none"> <li>• Behavioral: Progressive Resistance Training<br/>12 weeks supervised resistance training program. Details of the program: 12 weeks, 3 sessions per week, 7 exercises in training machines (leg press, leg curl, hamstring curl, chest press, lateral pull down, sit-ups and back extensions). In general 2-3 sets of 8-15 repetitions will be performed following a progression plan starting with more repetitions at lower intensity progressing to fewer repetitions at higher intensity during the 12-week period (American College of Sports Medicine Position Stand)</li> <li>• Behavioral: physical activity<br/>Weekly diary of performed physical activity using the Physical Activity Score (PAS) during the 12-weeks intervention<br/>Other Name: Diary of performed physical activity</li> <li>• Behavioral: Diet diary<br/>Weekly diet diary during the 12-weeks intervention</li> </ul> |
| <b>Study Arm (s)</b>                                                                                                                            | <ul style="list-style-type: none"> <li>• Experimental: Progressive Resistance Training<br/>12 weeks progressive resistance training (PRT) during and after concomitant chemoradiotherapy. Also optional/voluntary physical activity performed on their own is registered, as well as diet diary.<br/>Interventions: <ul style="list-style-type: none"> <li>◦ Behavioral: Progressive Resistance Training</li> <li>◦ Behavioral: physical activity</li> <li>◦ Behavioral: Diet diary</li> </ul> </li> <li>• Active Comparator: Control<br/>Control arm. Optional/voluntary physical activity performed on their own is registered, as well as diet diary.<br/>Interventions: <ul style="list-style-type: none"> <li>◦ Behavioral: physical activity</li> <li>◦ Behavioral: Diet diary</li> </ul> </li> </ul>                                                                                                                                   |
| <b>Publications *</b>                                                                                                                           | <i>Not Provided</i>                                                                                                                                                                                                                                                                                                                                                                                                                                                                                                                                                                                                                                                                                                                                                                                                                                                                                                                           |
| * Includes publications given by the data provider as well as publications identified by ClinicalTrials.gov Identifier (NCT Number) in Medline. |                                                                                                                                                                                                                                                                                                                                                                                                                                                                                                                                                                                                                                                                                                                                                                                                                                                                                                                                               |
| <b>Recruitment Information</b>                                                                                                                  |                                                                                                                                                                                                                                                                                                                                                                                                                                                                                                                                                                                                                                                                                                                                                                                                                                                                                                                                               |
| <b>Recruitment Status</b> <a href="#">ICMJE</a>                                                                                                 | Recruiting                                                                                                                                                                                                                                                                                                                                                                                                                                                                                                                                                                                                                                                                                                                                                                                                                                                                                                                                    |
| <b>Estimated Enrollment</b> <a href="#">ICMJE</a>                                                                                               | 72                                                                                                                                                                                                                                                                                                                                                                                                                                                                                                                                                                                                                                                                                                                                                                                                                                                                                                                                            |
| <b>Estimated Completion Date</b>                                                                                                                | May 2018                                                                                                                                                                                                                                                                                                                                                                                                                                                                                                                                                                                                                                                                                                                                                                                                                                                                                                                                      |
| <b>Estimated Primary Completion Date</b>                                                                                                        | December 2017 (final data collection date for primary outcome measure)                                                                                                                                                                                                                                                                                                                                                                                                                                                                                                                                                                                                                                                                                                                                                                                                                                                                        |
| <b>Eligibility Criteria</b> <a href="#">ICMJE</a>                                                                                               | <p>Inclusion Criteria:</p> <ul style="list-style-type: none"> <li>• Patients with biopsy verified head and neck squamous cell carcinoma referred for primary curatively intended treatment.</li> <li>• Candidates for concomitant chemoradiotherapy (2Gyx33-34; 6F/W; weekly cisplatin 40mg/m2, max. 70 mg/weekly) according to Danish Head and Neck Cancer Group (DAHANCA) guidelines (T1-4, N1-3, M0) <ul style="list-style-type: none"> <li>◦ Performance status 0-1</li> <li>◦ At least 18 years of age.</li> </ul> </li> </ul> <p>Exclusion Criteria:</p> <ul style="list-style-type: none"> <li>• BMI below 20.5</li> <li>• diabetes</li> <li>• corticosteroid treatment for other diseases</li> </ul>                                                                                                                                                                                                                                  |

|                                                                                                                                                                              |                                                                                                                                                                                                                                                                                                                                                                                           |                                    |              |                             |  |                             |              |                                    |  |
|------------------------------------------------------------------------------------------------------------------------------------------------------------------------------|-------------------------------------------------------------------------------------------------------------------------------------------------------------------------------------------------------------------------------------------------------------------------------------------------------------------------------------------------------------------------------------------|------------------------------------|--------------|-----------------------------|--|-----------------------------|--------------|------------------------------------|--|
|                                                                                                                                                                              | <ul style="list-style-type: none"> <li>• Tonsillectomy within the last week before inclusion.</li> <li>• hemoglobin below 6 mmol/l</li> <li>• leucocytes below <math>2.5 \times 10^9</math> /l</li> <li>• thrombocytes below <math>50 \times 10^9</math> /l</li> <li>• comorbidities, social, familial or geographical conditions, that could compromise attendance or results</li> </ul> |                                    |              |                             |  |                             |              |                                    |  |
| <b>Gender</b>                                                                                                                                                                | Both                                                                                                                                                                                                                                                                                                                                                                                      |                                    |              |                             |  |                             |              |                                    |  |
| <b>Ages</b>                                                                                                                                                                  | 18 Years and older (Adult, Senior)                                                                                                                                                                                                                                                                                                                                                        |                                    |              |                             |  |                             |              |                                    |  |
| <b>Accepts Healthy Volunteers</b>                                                                                                                                            | No                                                                                                                                                                                                                                                                                                                                                                                        |                                    |              |                             |  |                             |              |                                    |  |
| <b>Contacts</b> <a href="#">ICMJE</a>                                                                                                                                        | <table border="1"> <tr> <td>Contact: Julie Gehl</td> <td>004538683868</td> <td>karen.julie.gehl@regionh.dk</td> <td></td> </tr> <tr> <td>Contact: Camilla K Lonkvist</td> <td>004538689571</td> <td>camilla.kjaer.loenkvist@regionh.dk</td> <td></td> </tr> </table>                                                                                                                      | Contact: Julie Gehl                | 004538683868 | karen.julie.gehl@regionh.dk |  | Contact: Camilla K Lonkvist | 004538689571 | camilla.kjaer.loenkvist@regionh.dk |  |
| Contact: Julie Gehl                                                                                                                                                          | 004538683868                                                                                                                                                                                                                                                                                                                                                                              | karen.julie.gehl@regionh.dk        |              |                             |  |                             |              |                                    |  |
| Contact: Camilla K Lonkvist                                                                                                                                                  | 004538689571                                                                                                                                                                                                                                                                                                                                                                              | camilla.kjaer.loenkvist@regionh.dk |              |                             |  |                             |              |                                    |  |
| <b>Listed Location Countries</b> <a href="#">ICMJE</a>                                                                                                                       | Denmark                                                                                                                                                                                                                                                                                                                                                                                   |                                    |              |                             |  |                             |              |                                    |  |
| <b>Removed Location Countries</b>                                                                                                                                            |                                                                                                                                                                                                                                                                                                                                                                                           |                                    |              |                             |  |                             |              |                                    |  |
| <b>Administrative Information</b>                                                                                                                                            |                                                                                                                                                                                                                                                                                                                                                                                           |                                    |              |                             |  |                             |              |                                    |  |
| <b>NCT Number</b> <a href="#">ICMJE</a>                                                                                                                                      | NCT02557529                                                                                                                                                                                                                                                                                                                                                                               |                                    |              |                             |  |                             |              |                                    |  |
| <b>Other Study ID Numbers</b> <a href="#">ICMJE</a>                                                                                                                          | DAHANCA 31                                                                                                                                                                                                                                                                                                                                                                                |                                    |              |                             |  |                             |              |                                    |  |
| <b>Has Data Monitoring Committee</b>                                                                                                                                         | No                                                                                                                                                                                                                                                                                                                                                                                        |                                    |              |                             |  |                             |              |                                    |  |
| <b>Plan to Share Data</b>                                                                                                                                                    | <i>Not Provided</i>                                                                                                                                                                                                                                                                                                                                                                       |                                    |              |                             |  |                             |              |                                    |  |
| <b>IPD Description</b>                                                                                                                                                       | <i>Not Provided</i>                                                                                                                                                                                                                                                                                                                                                                       |                                    |              |                             |  |                             |              |                                    |  |
| <b>Responsible Party</b>                                                                                                                                                     | Julie Gehl, Herlev Hospital                                                                                                                                                                                                                                                                                                                                                               |                                    |              |                             |  |                             |              |                                    |  |
| <b>Study Sponsor</b> <a href="#">ICMJE</a>                                                                                                                                   | Herlev Hospital                                                                                                                                                                                                                                                                                                                                                                           |                                    |              |                             |  |                             |              |                                    |  |
| <b>Collaborators</b> <a href="#">ICMJE</a>                                                                                                                                   | <ul style="list-style-type: none"> <li>• Aarhus University Hospital</li> <li>• Odense University Hospital</li> <li>• Danish Head and Neck Cancer Group</li> </ul>                                                                                                                                                                                                                         |                                    |              |                             |  |                             |              |                                    |  |
| <b>Investigators</b> <a href="#">ICMJE</a>                                                                                                                                   | <table border="1"> <tr> <td>Principal Investigator:</td> <td>Julie Gehl</td> <td>Herlev Hospital</td> </tr> </table>                                                                                                                                                                                                                                                                      | Principal Investigator:            | Julie Gehl   | Herlev Hospital             |  |                             |              |                                    |  |
| Principal Investigator:                                                                                                                                                      | Julie Gehl                                                                                                                                                                                                                                                                                                                                                                                | Herlev Hospital                    |              |                             |  |                             |              |                                    |  |
| <b>Information Provided By</b>                                                                                                                                               | Herlev Hospital                                                                                                                                                                                                                                                                                                                                                                           |                                    |              |                             |  |                             |              |                                    |  |
| <b>Verification Date</b>                                                                                                                                                     | May 2016                                                                                                                                                                                                                                                                                                                                                                                  |                                    |              |                             |  |                             |              |                                    |  |
| <a href="#">ICMJE</a> Data element required by the <a href="#">International Committee of Medical Journal Editors</a> and the <a href="#">World Health Organization ICTR</a> |                                                                                                                                                                                                                                                                                                                                                                                           |                                    |              |                             |  |                             |              |                                    |  |
