# Supplementary material for: Progressive resistance training in head and neck cancer patients during concomitant chemoradiotherapy -- design of the DAHANCA 31 randomized trial
Source: Springer Nature journal article supplement (doi:10.1186/s12885-017-3388-0), 2017-06-03
Supplement: MOESM4 [file 12336506]

**Additional Table 1. Antiemetic regimen.**

|       | Herlev site<br>prior to May 23 <sup>rd</sup> 2016 |                | Herlev site<br>after May 23 <sup>rd</sup> 2016 |             | Aarhus site  |             |
|-------|---------------------------------------------------|----------------|------------------------------------------------|-------------|--------------|-------------|
|       | Medicine                                          | Dose           | Medicine                                       | Dose        | Medicine     | Dose        |
| Day 1 | Prednisolone                                      | 100 mg P.O.    | Palonosetron                                   | 0.5 mg P.O. | Palonosetron | 0.5 mg P.O. |
|       | Ondansetron                                       | 16-24 mg P.O.  | Aprepitant                                     | 125 mg P.O. | Aprepitant   | 125 mg P.O. |
|       |                                                   |                | Prednisolone                                   | 50 mg P.O.  | Prednisolone | 50 mg P.O.  |
| Day 2 | Prednisolone                                      | 2 x 50 mg P.O. | Aprepitant                                     | 80 mg P.O.  | Aprepitant   | 80 mg P.O.  |
|       |                                                   |                | Prednisolone                                   | 50 mg P.O.  | Prednisolone | 50 mg P.O.  |
| Day 3 | Prednisolone                                      | 2 x 25 mg P.O. | Prednisolone                                   | 50 mg P.O.  | Aprepitant   | 80 mg P.O.  |
| Day 4 | Prednisolone                                      | 25 mg P.O.     | Prednisolone                                   | 25 mg P.O.  |              |             |

Additional Table 1. Antiemetics are given according to institutional guidelines. At Herlev site the regimen changed May 23<sup>rd</sup> 2016 due to standardization in the Capital Region. Day 1 is the day cisplatin is given. In addition, Domperidon 20-30 mg PRN is administered P.O. a maximum of thrice daily. Abbreviations: p.o., per os. PRN, pro re nata (when necessary).
