# Supplementary material for: Progressive resistance training in head and neck cancer patients during concomitant chemoradiotherapy -- design of the DAHANCA 31 randomized trial
Source: Springer Nature journal article supplement (doi:10.1186/s12885-017-3388-0), 2017-06-03
Supplement: MOESM5 [file 12336506]

Additional Figure 1. Illustrations of the exercises

---

|    |                                                                                   |                                  |
|----|-----------------------------------------------------------------------------------|----------------------------------|
| 1. |  | Abdominal crunches (Herlev site) |
|    |  | Sit ups (Aarhus site)            |

---

|    |                                                                                   |                 |
|----|-----------------------------------------------------------------------------------|-----------------|
| 2. |  | Back extensions |
|----|-----------------------------------------------------------------------------------|-----------------|

---

|    |                                                                                   |             |
|----|-----------------------------------------------------------------------------------|-------------|
| 3. |  | Chest Press |
|----|-----------------------------------------------------------------------------------|-------------|

---

|    |                                                                                   |                                 |
|----|-----------------------------------------------------------------------------------|---------------------------------|
| 4. |  | Lateral pull down (Aarhus site) |
|    |  | Low row (Herlev site)           |

---

|    |                                                                                   |                 |
|----|-----------------------------------------------------------------------------------|-----------------|
| 5. |  | Hamstring curls |
|----|-----------------------------------------------------------------------------------|-----------------|

---

|    |                                                                                   |                 |
|----|-----------------------------------------------------------------------------------|-----------------|
| 6. |  | Knee extensions |
|----|-----------------------------------------------------------------------------------|-----------------|

---

|    |                                                                                   |           |
|----|-----------------------------------------------------------------------------------|-----------|
| 7. |  | Leg press |
|----|-----------------------------------------------------------------------------------|-----------|

---
